# Supplementary material for: Natural Product-Based Pesticide Discovery: Design, Synthesis and Bioactivity Studies of N-Amino-Maleimide Derivatives
Source: PubMed Central journal article supplement (PMC6099656; doi:10.3390/molecules23071521), 2018-06-24
Supplement: molecules-23-01521-s001.pdf [file molecules-23-01521-s001.pdf]

# Electronic Supporting Information (ESI) for:

Design, Synthesis and Bioactivity Studies of  
N-Amino-Maleimide Derivatives Containing  
Hydrazone Group

## Content

$^1\text{H-NMR}$  and  $^{13}\text{C-NMR}$  Spectra (Figure S1-S34)  
for compounds **1-17**

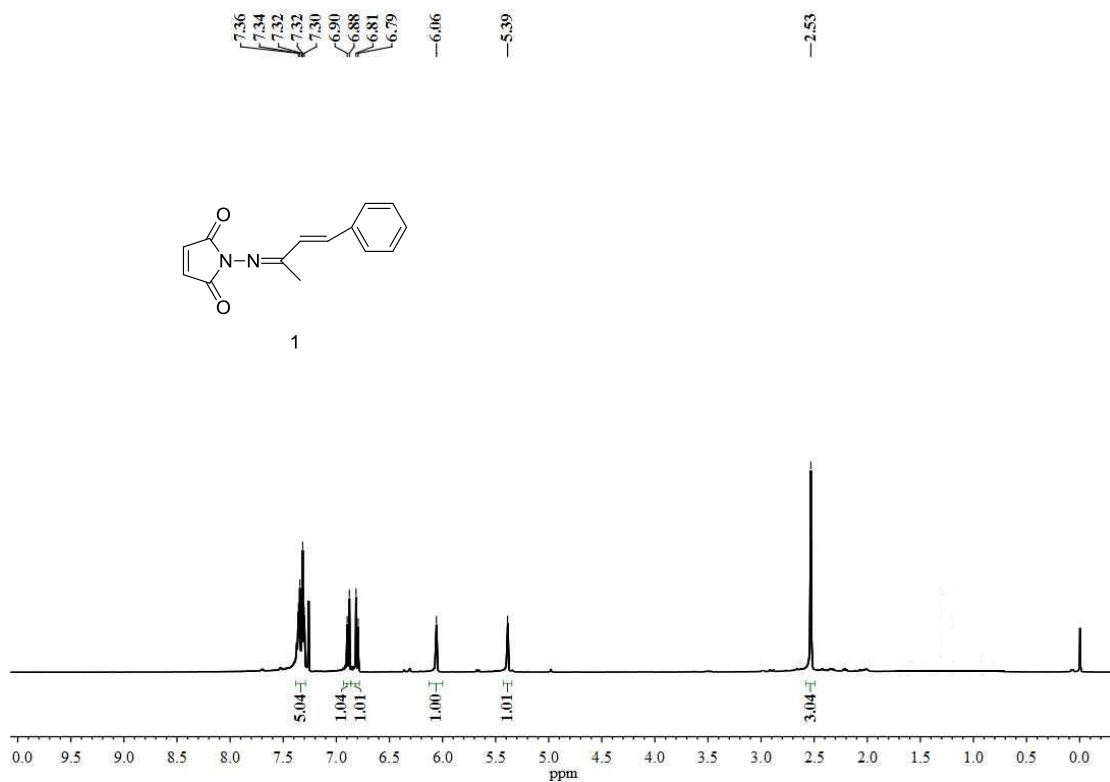

Figure S1 <sup>1</sup>H NMR spectra of compound 1

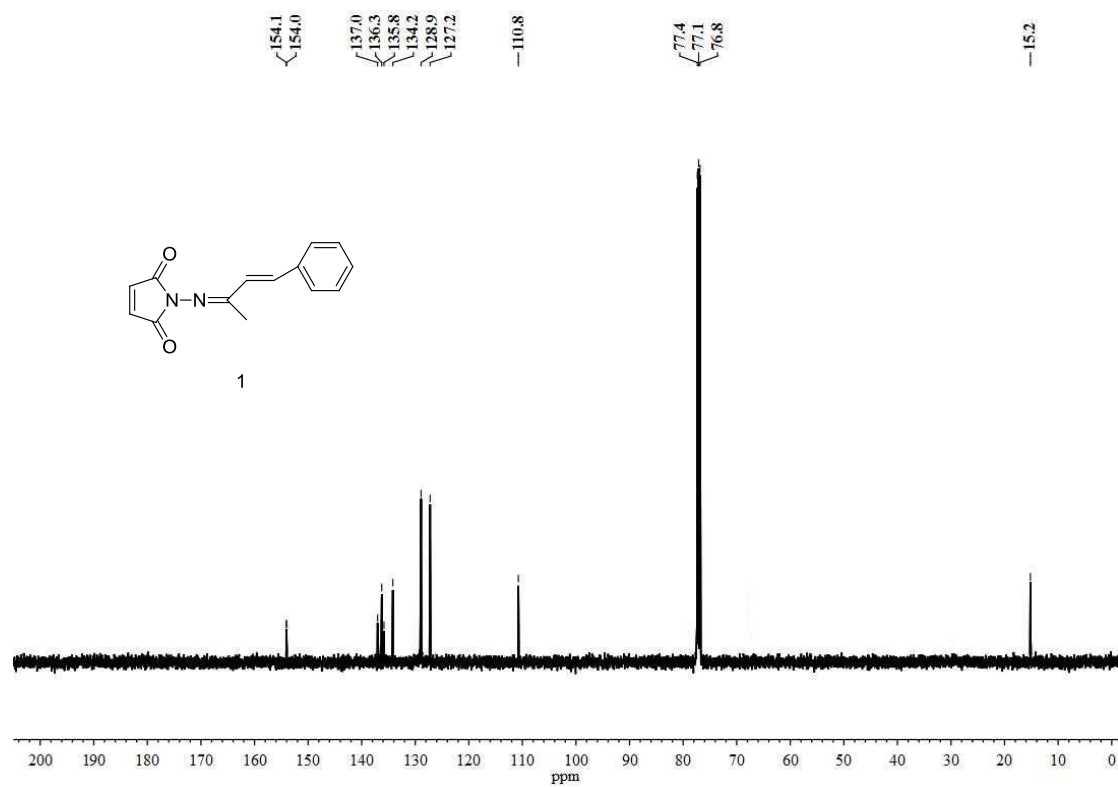

Figure S2 <sup>13</sup>C NMR spectra of compound 1

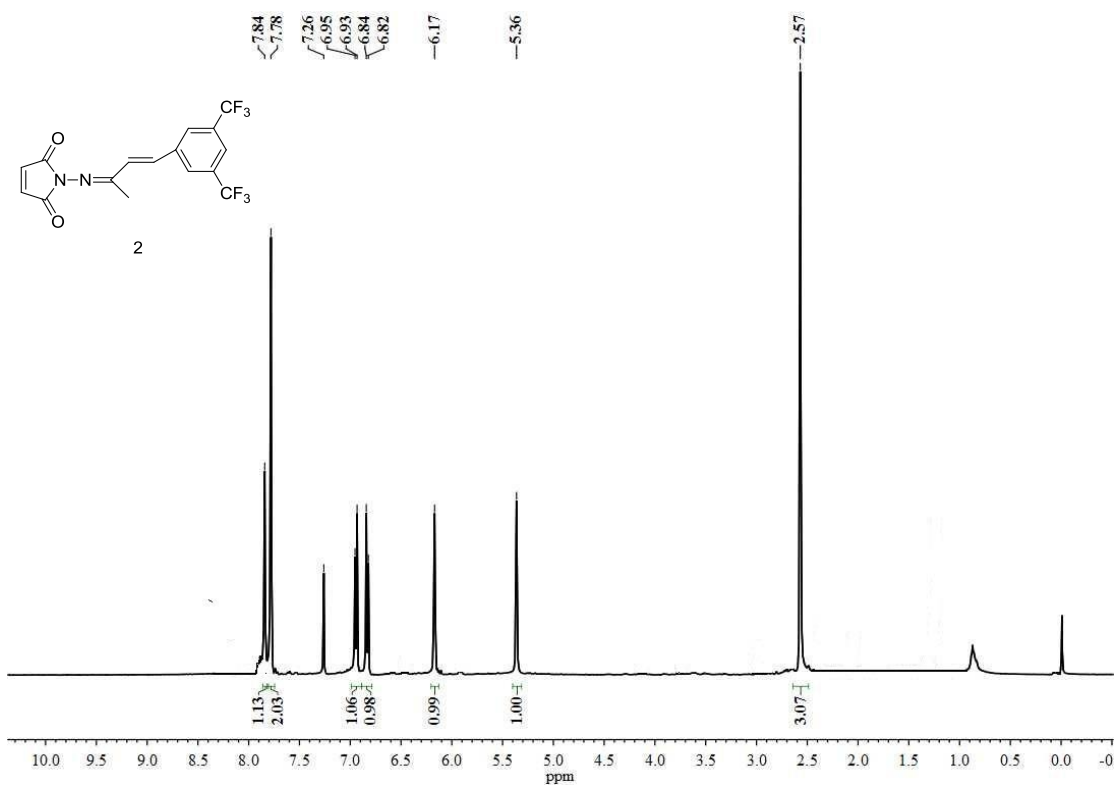

Figure S3 <sup>1</sup>H NMR spectra of compound 2

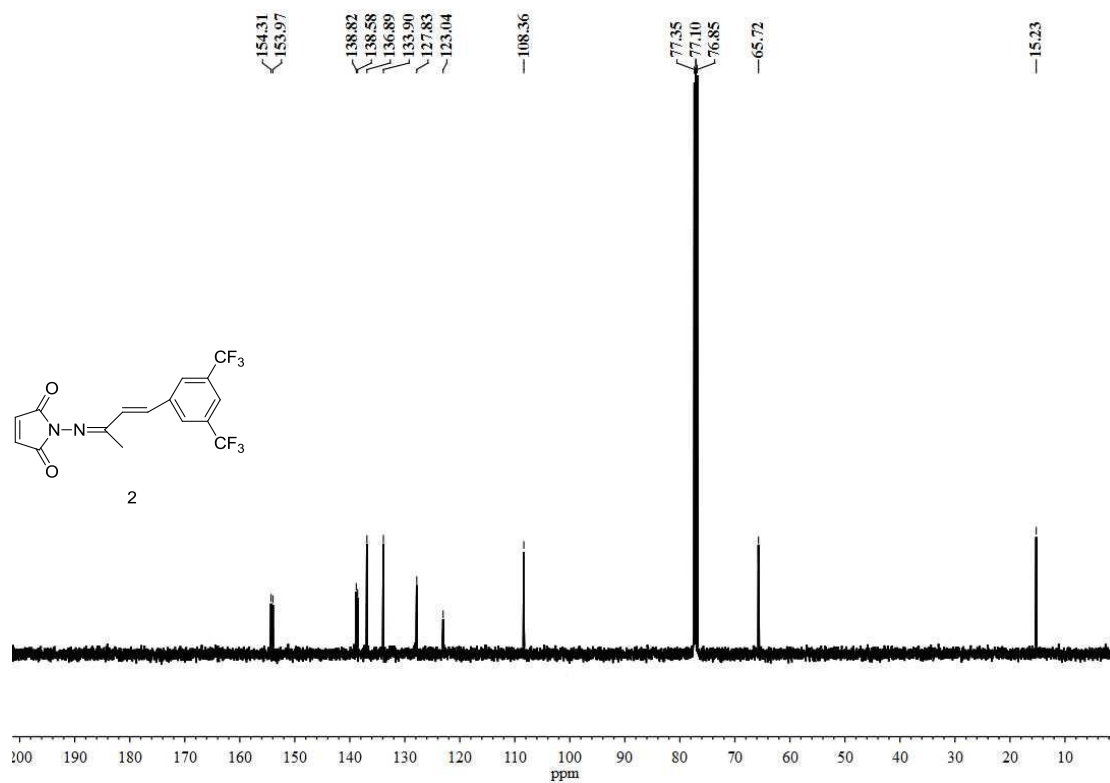

Figure S4 <sup>13</sup>C NMR spectra of compound 2

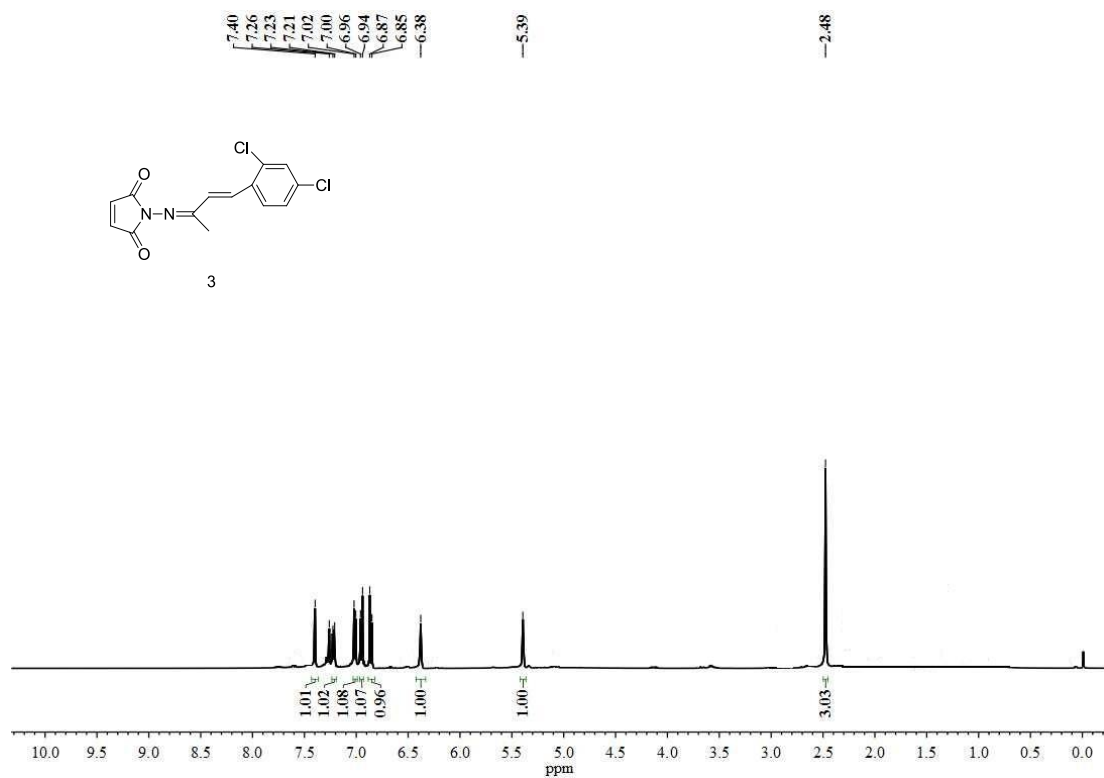

Figure S5 <sup>1</sup>H NMR spectra of compound 3

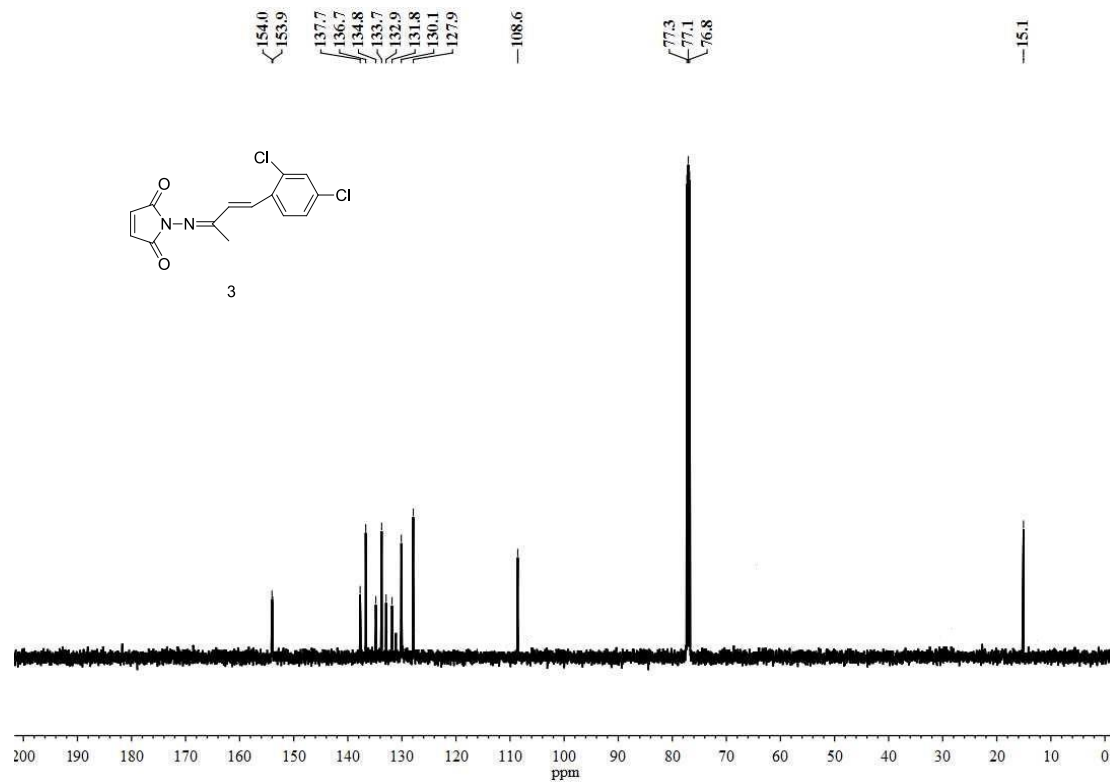

Figure S6 <sup>13</sup>C NMR spectra of compound 3

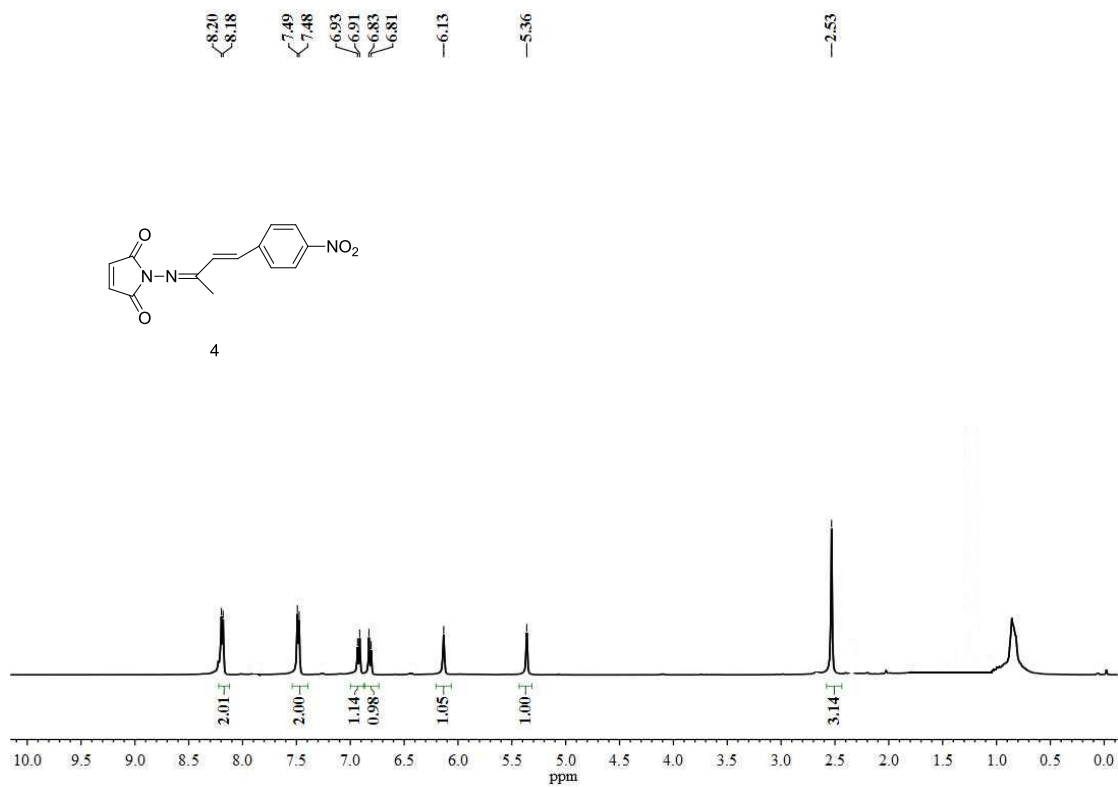

Figure S7 <sup>1</sup>H NMR spectra of compound 4

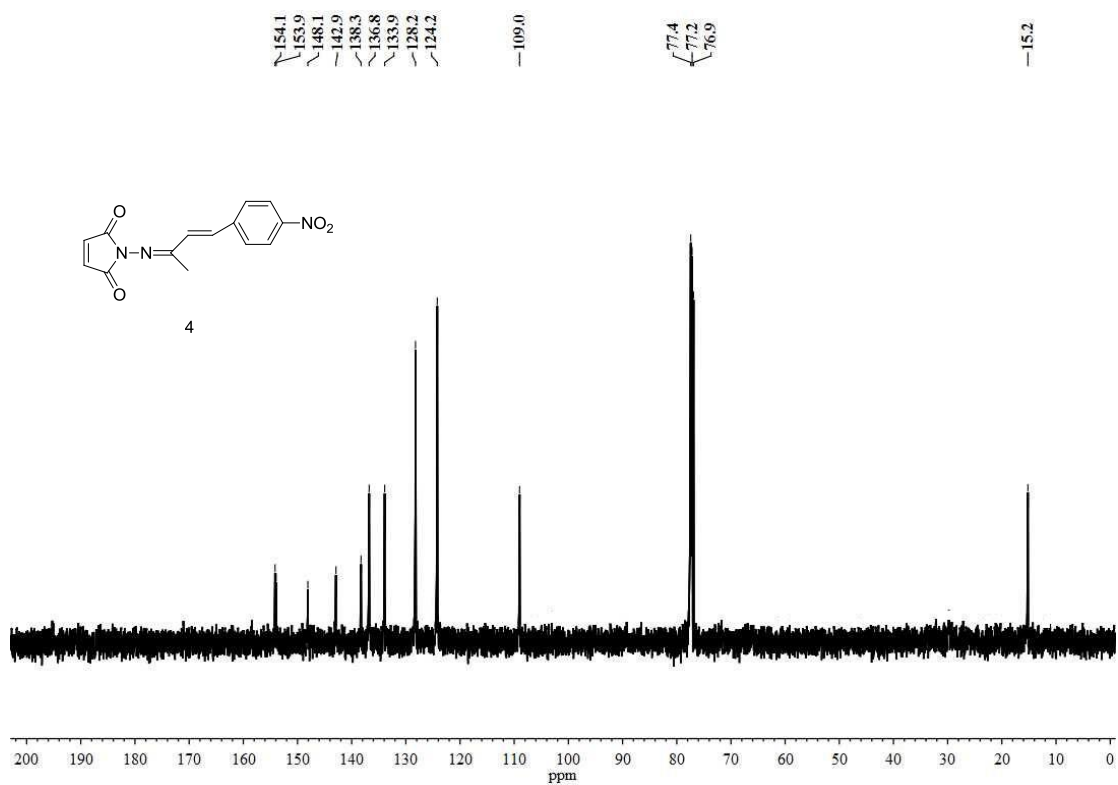

Figure S8 <sup>13</sup>C NMR spectra of compound 4

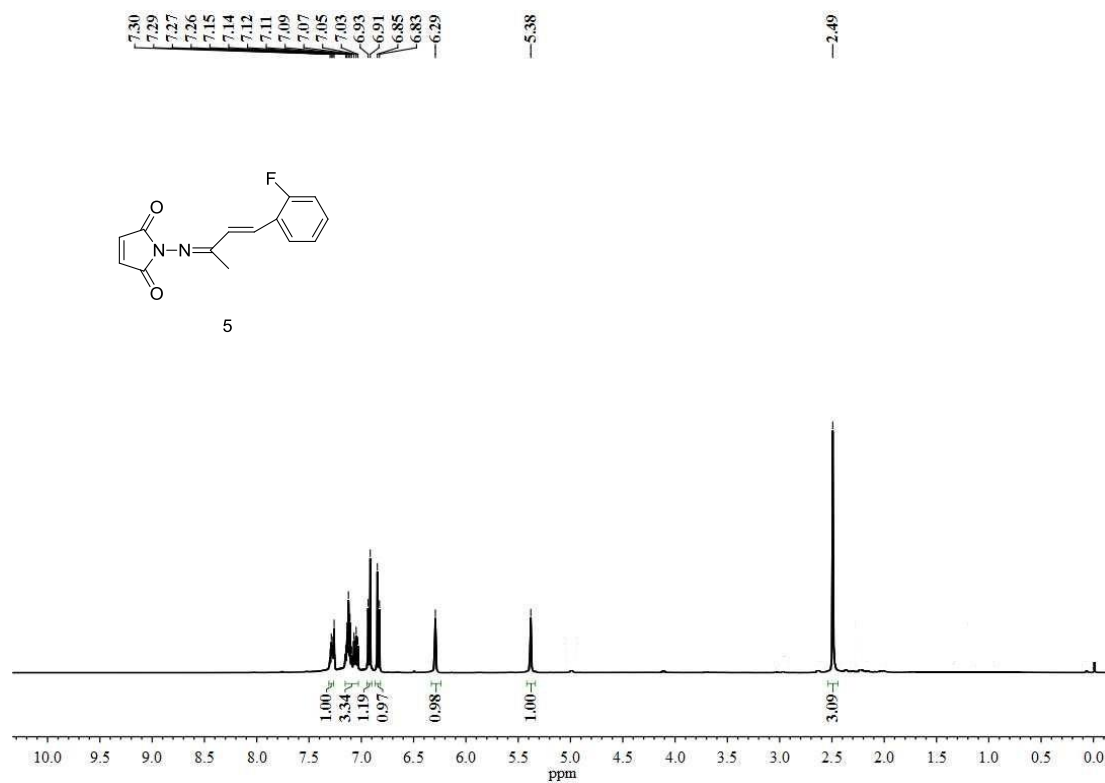

Figure S9 <sup>1</sup>H NMR spectra of compound 5

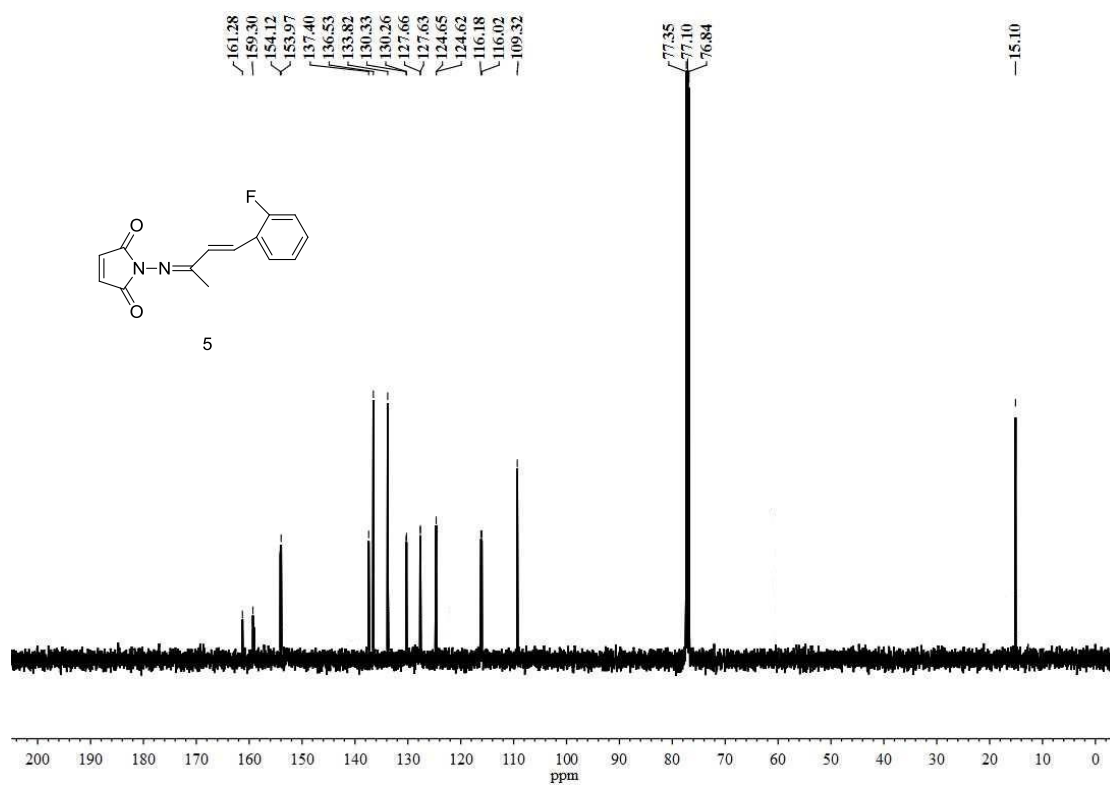

Figure S10 <sup>13</sup>C NMR spectra of compound 5

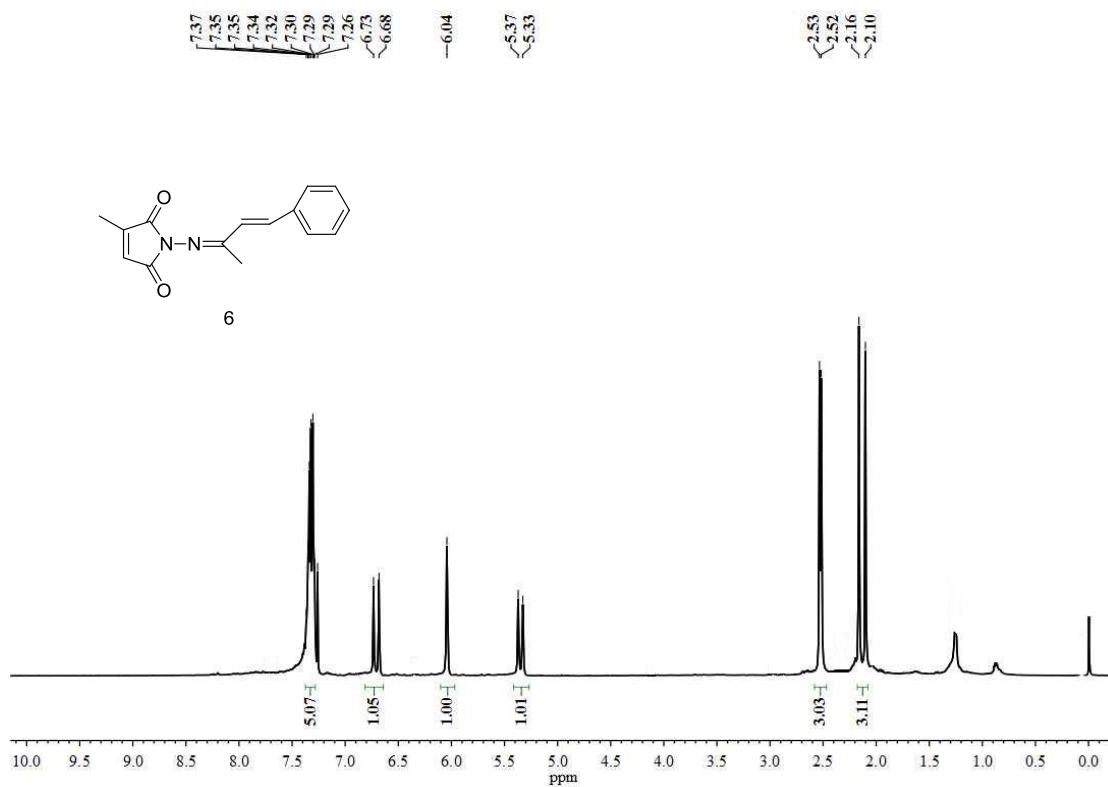

Figure S11  $^1\text{H}$  NMR spectra of compound 6

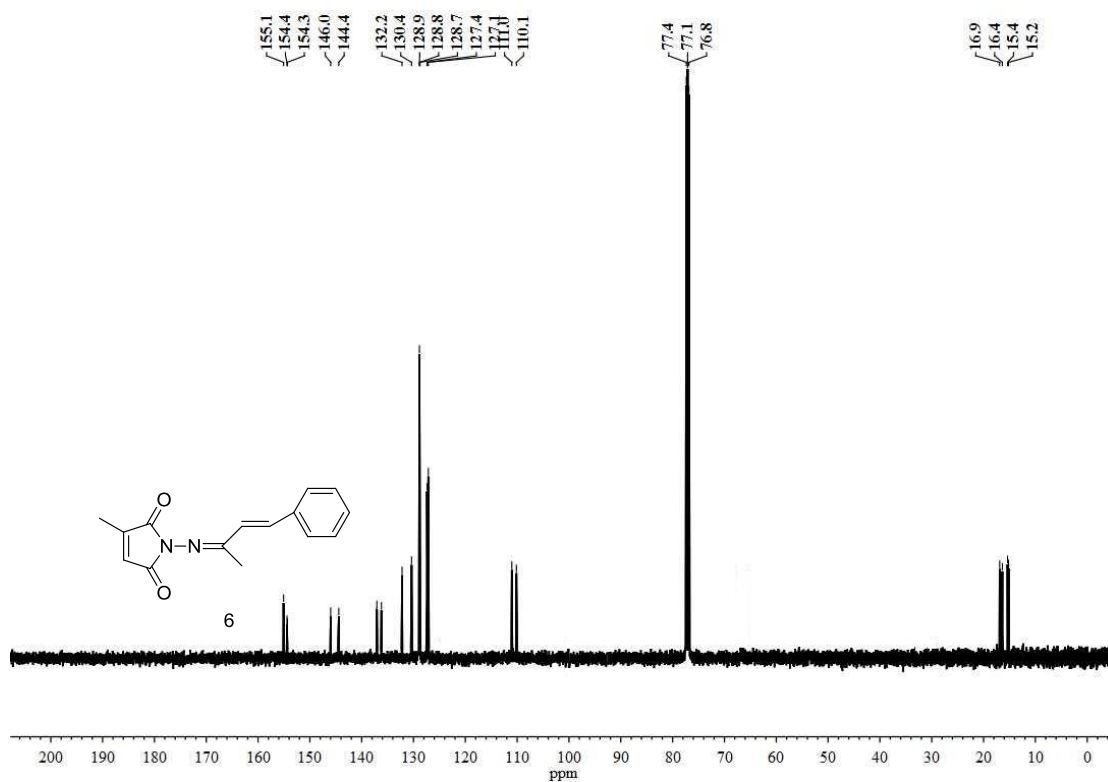

Figure S12  $^{13}\text{C}$  NMR spectra of compound 6

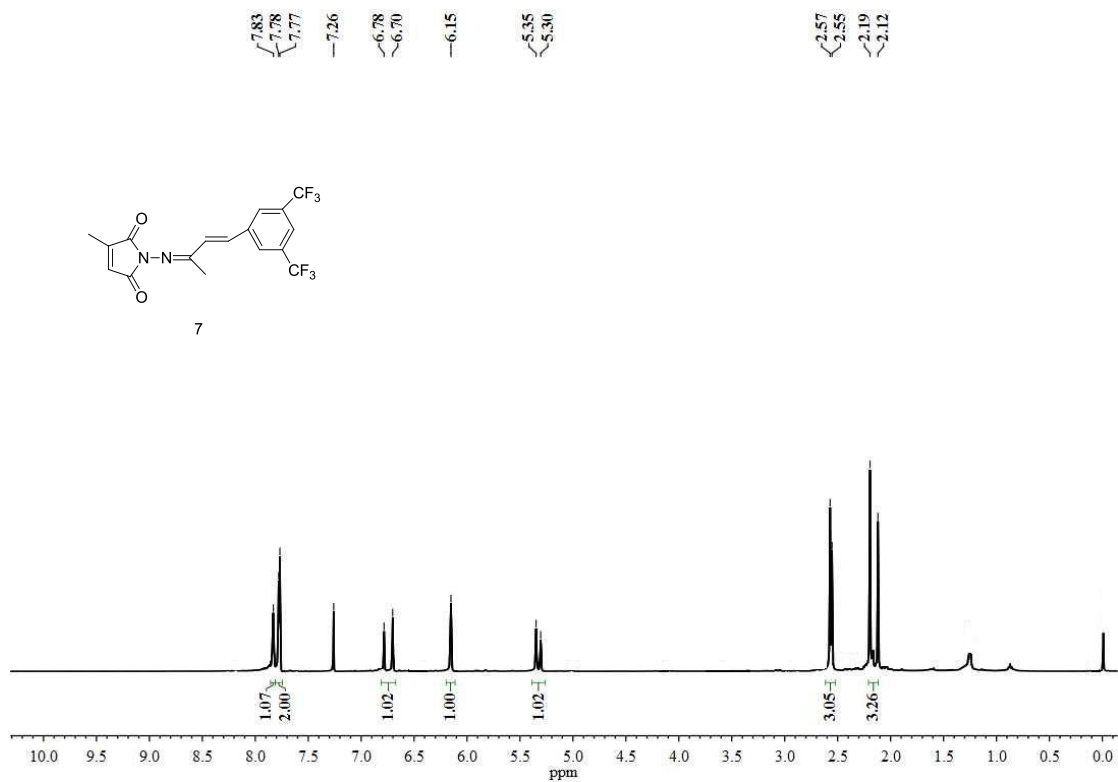

Figure S13 <sup>1</sup>H NMR spectra of compound 7

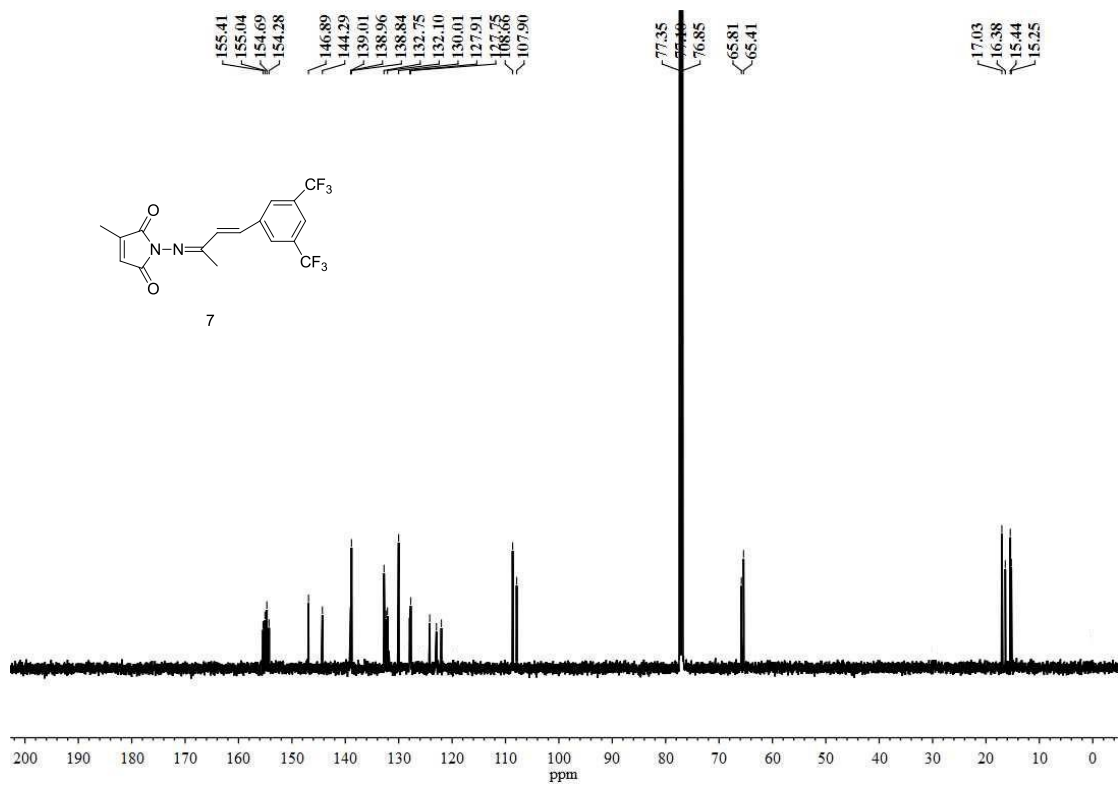

Figure S14 <sup>13</sup>C NMR spectra of compound 7



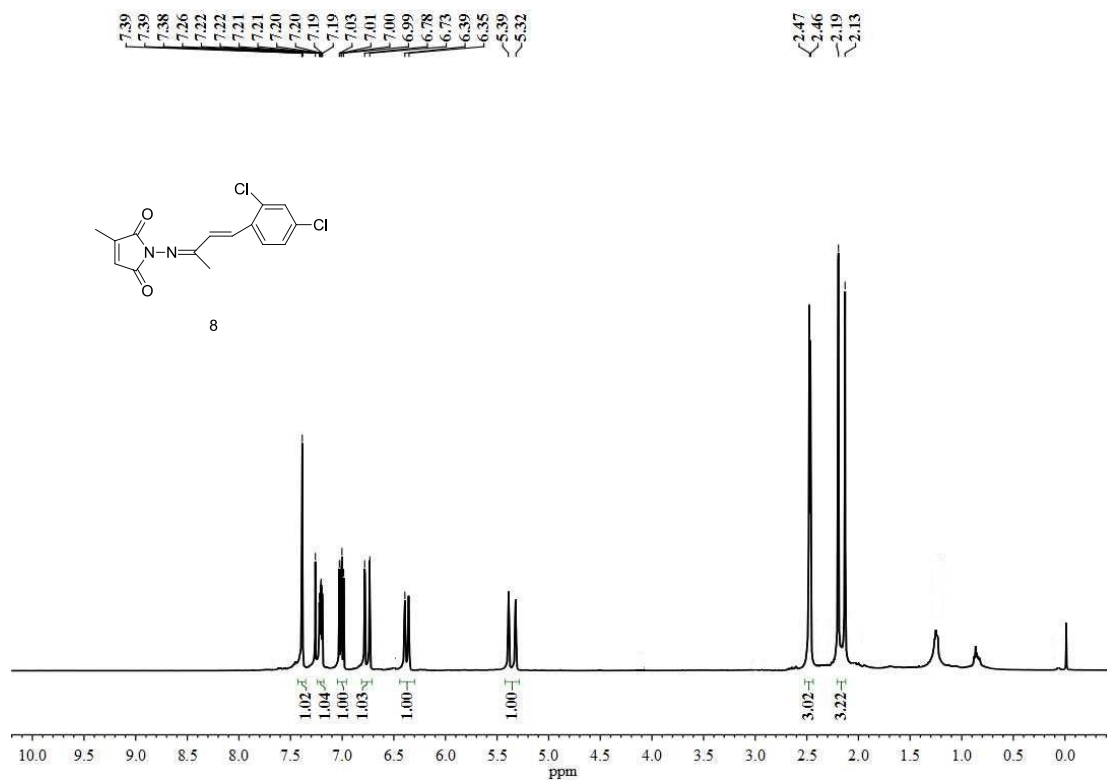

Figure S15 <sup>1</sup>H NMR spectra of compound 8

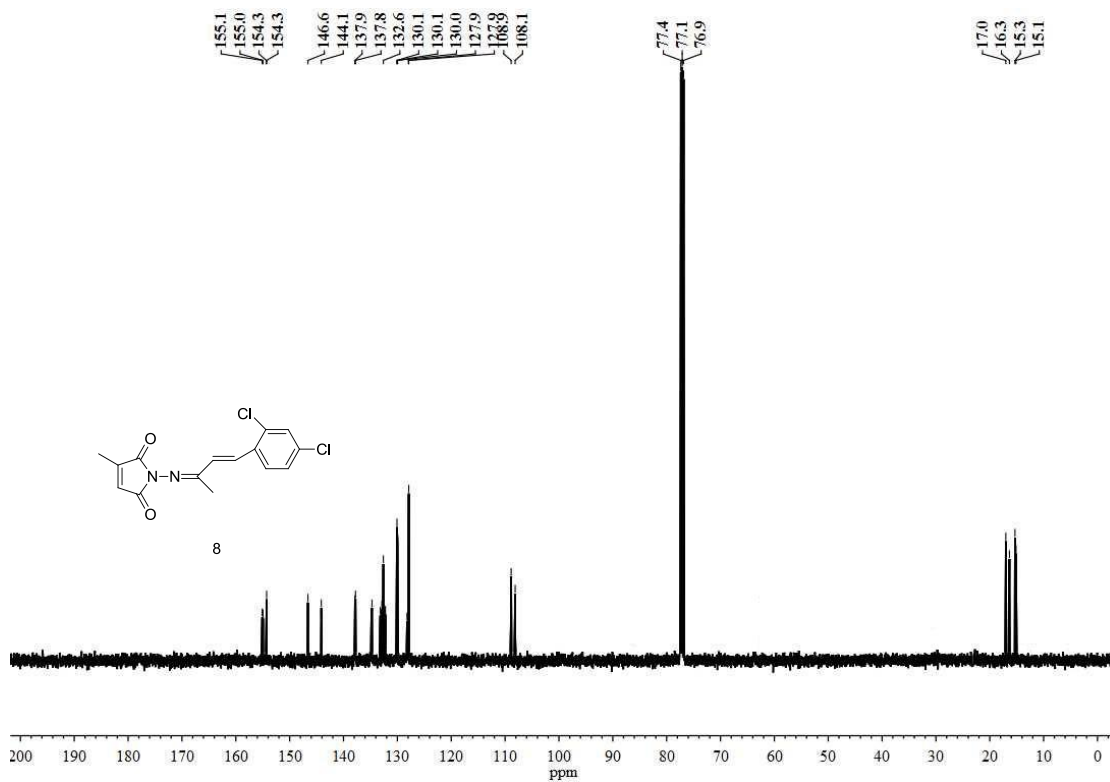

Figure S16 <sup>13</sup>C NMR spectra of compound 8

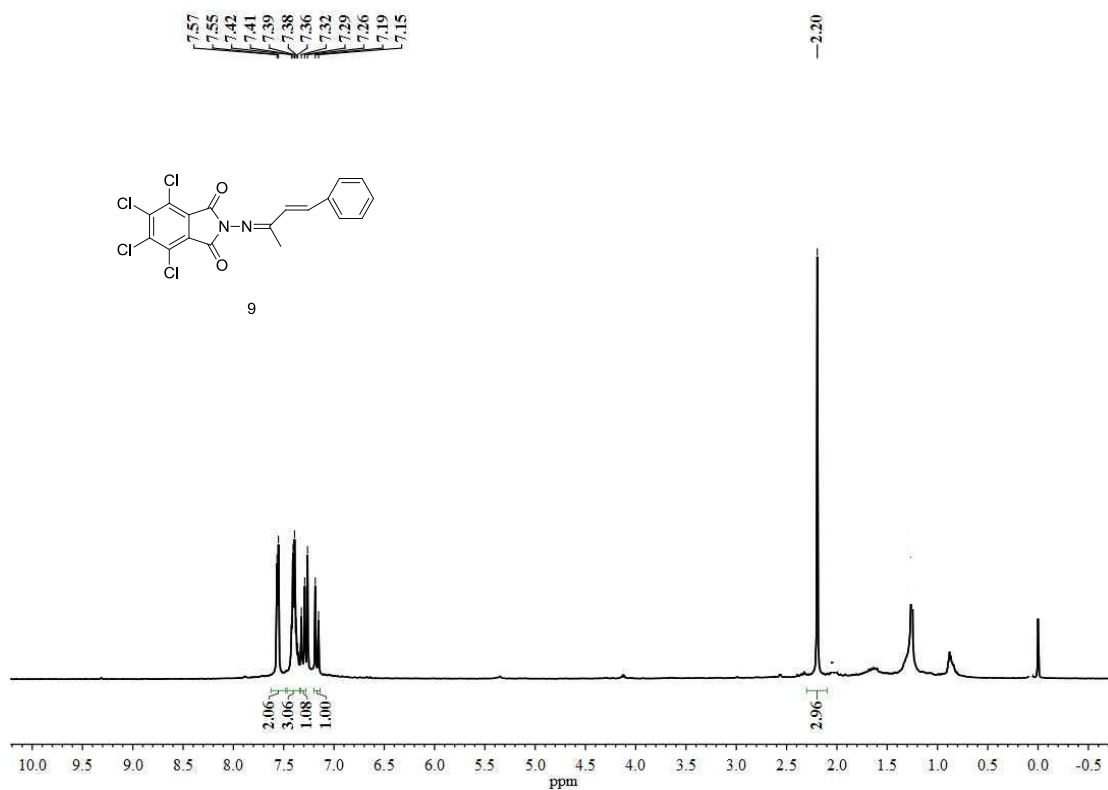

Figure S17 <sup>1</sup>H NMR spectra of compound 9

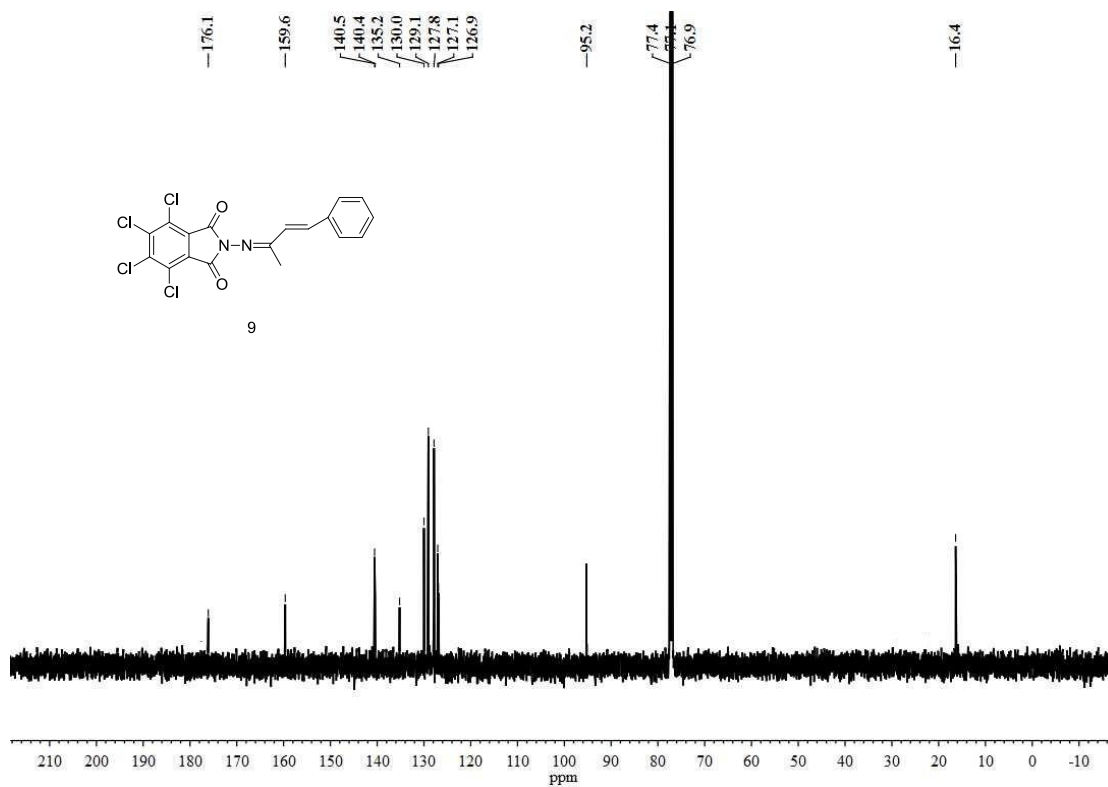

Figure S18 <sup>13</sup>C NMR spectra of compound 9

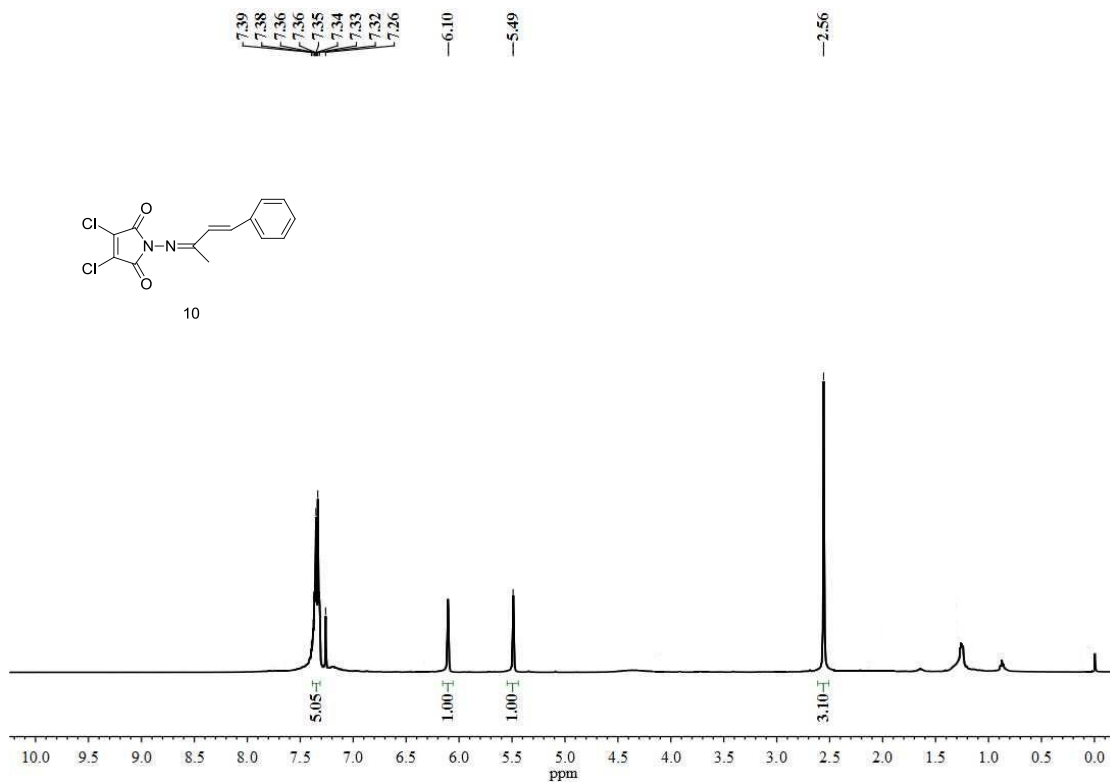

Figure S19 <sup>1</sup>H NMR spectra of compound 10

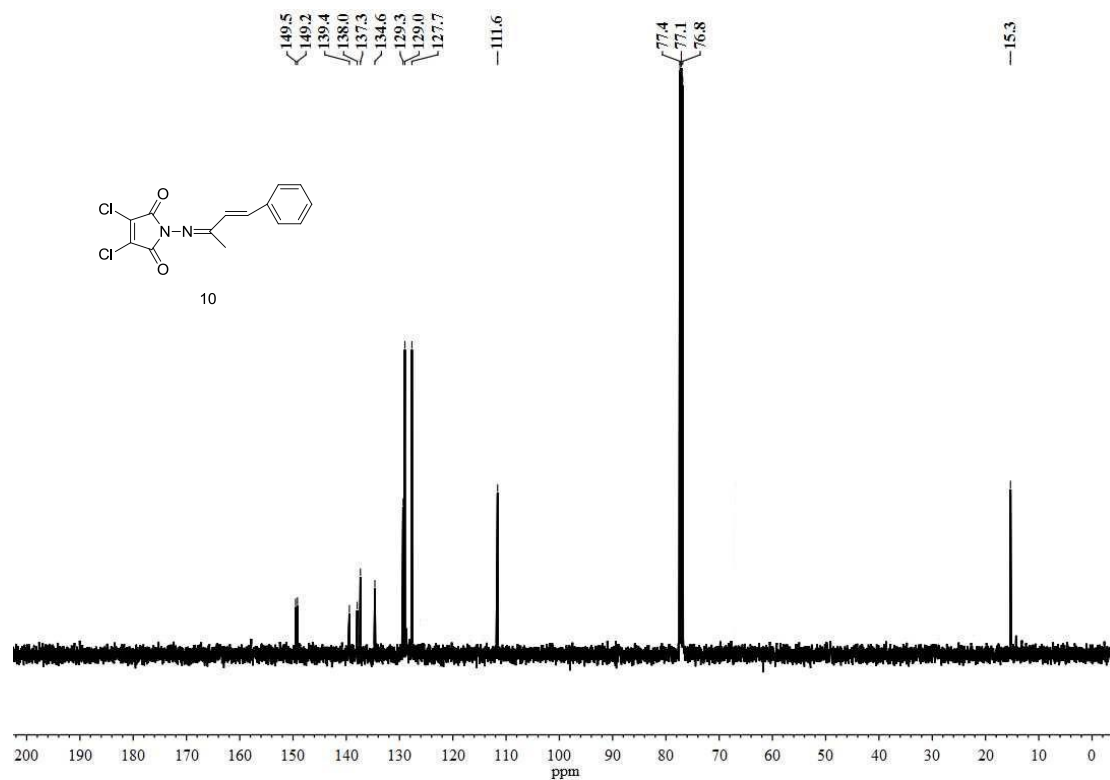

Figure S20 <sup>13</sup>C NMR spectra of compound 10

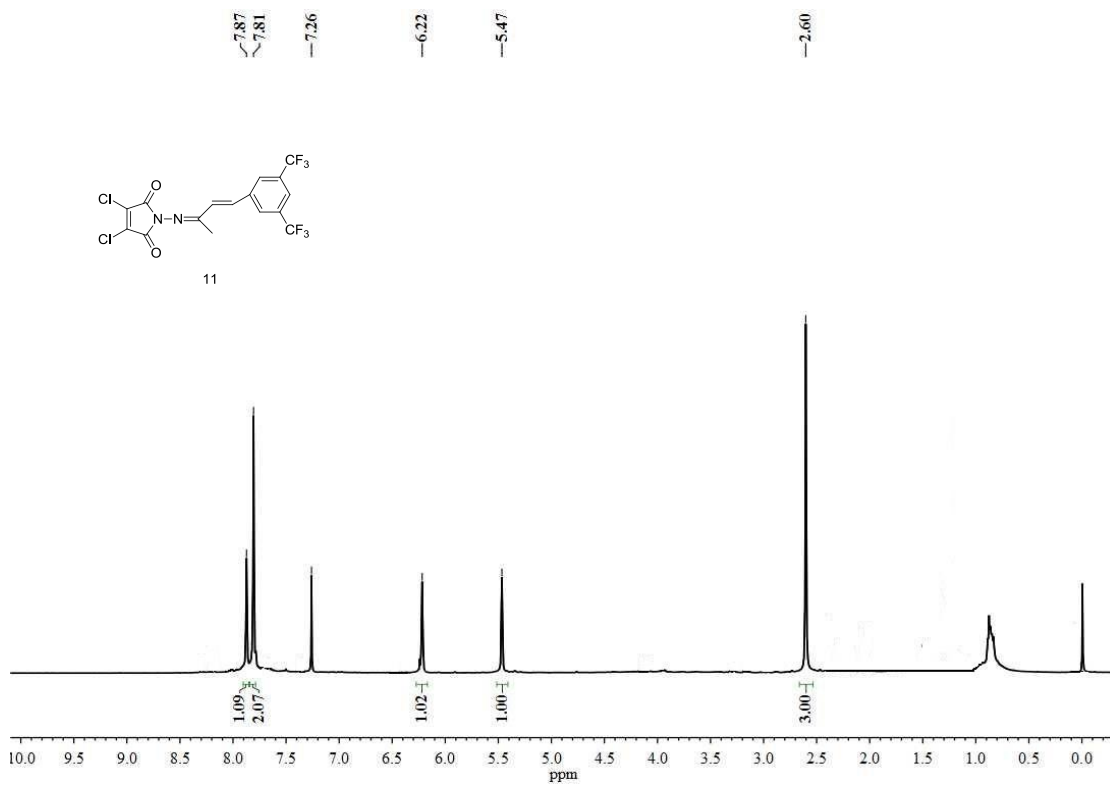

Figure S21 <sup>1</sup>H NMR spectra of compound 11

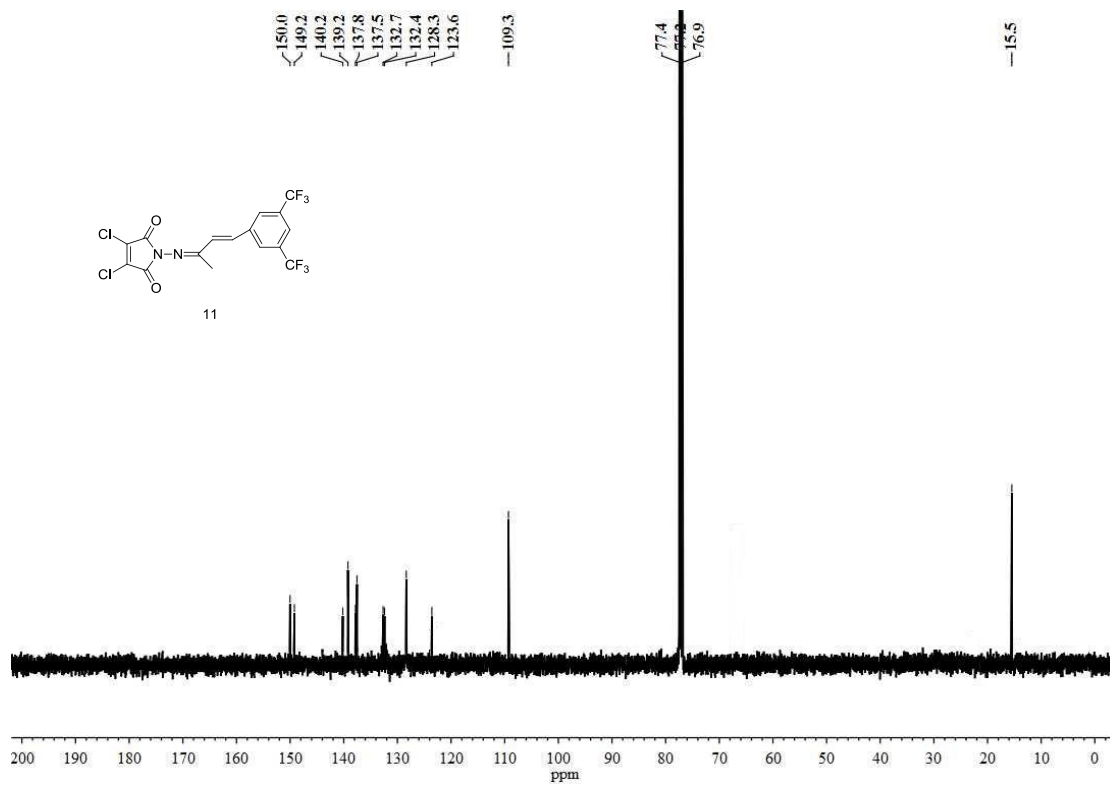

Figure S22 <sup>13</sup>C NMR spectra of compound 11

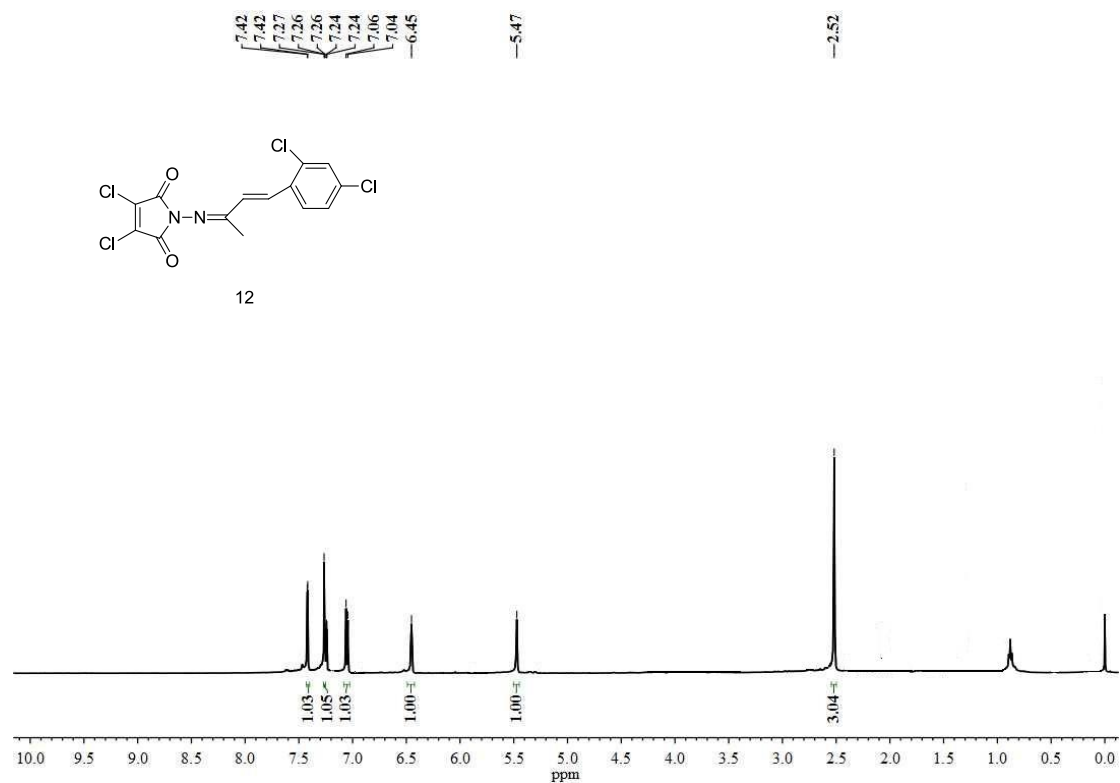

Figure S23 <sup>1</sup>H NMR spectra of compound 12

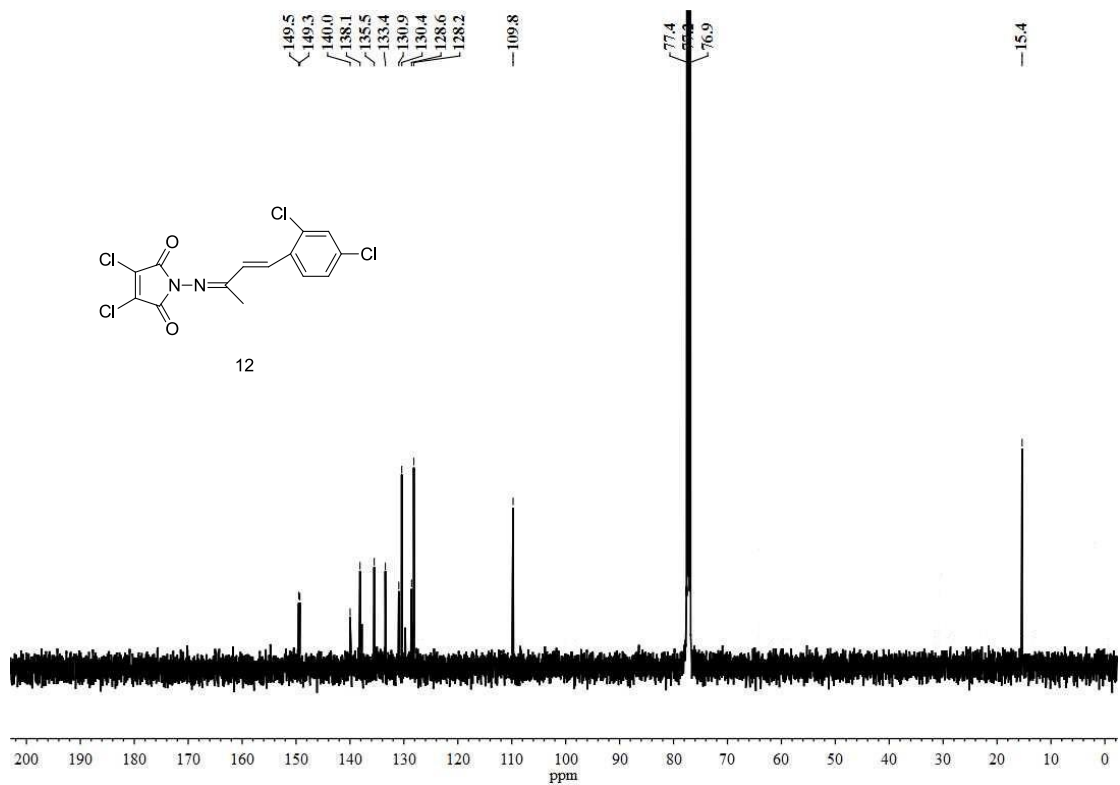

Figure S24 <sup>13</sup>C NMR spectra of compound 12

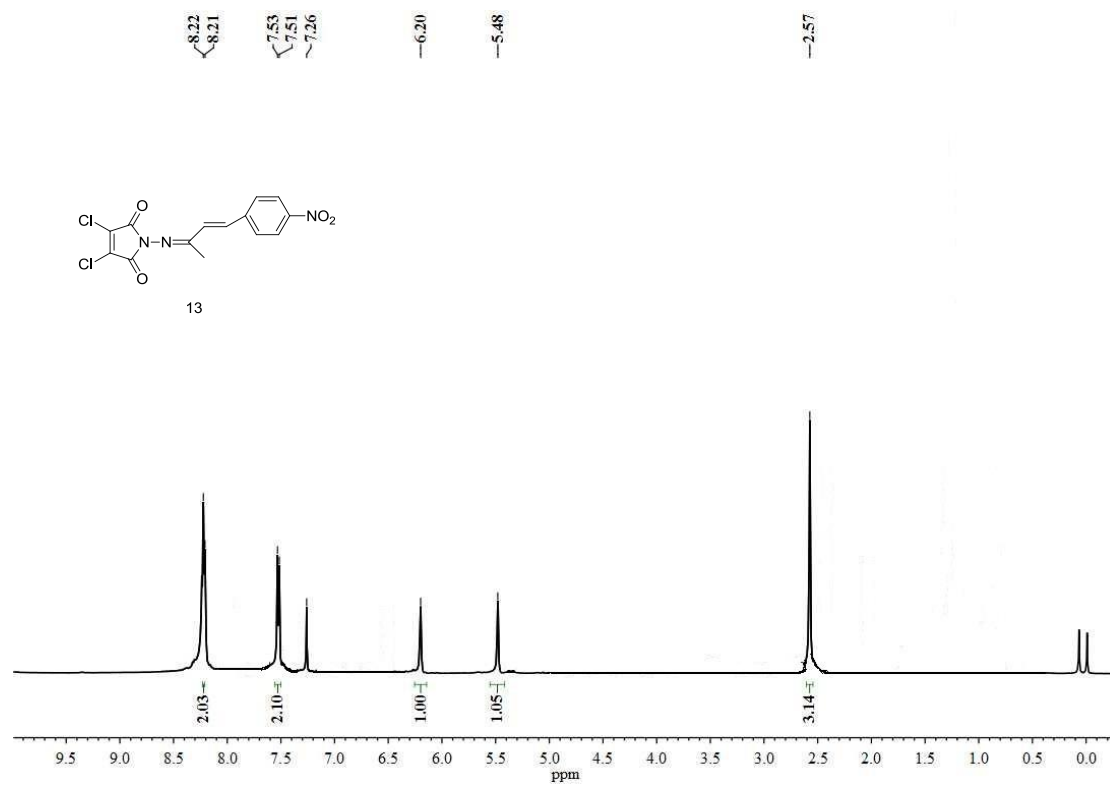

Figure S25 <sup>1</sup>H NMR spectra of compound 13

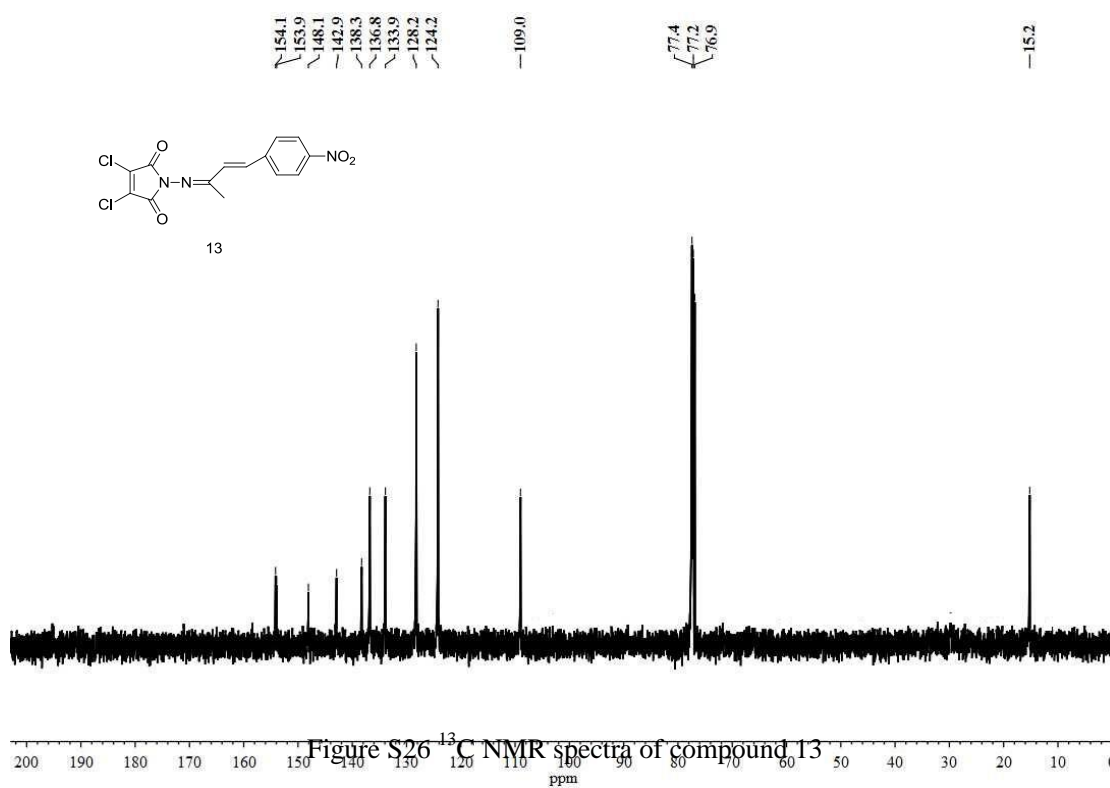

Figure S26 <sup>13</sup>C NMR spectra of compound 13

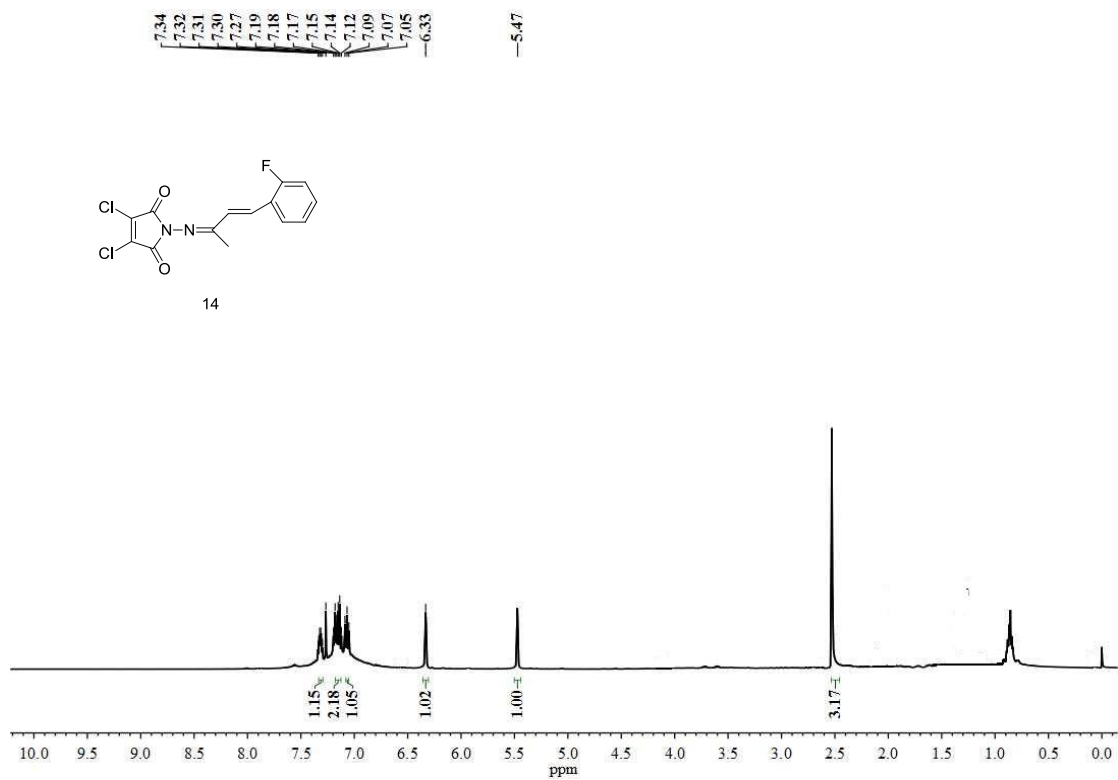

Figure S27 <sup>1</sup>H NMR spectra of compound 14

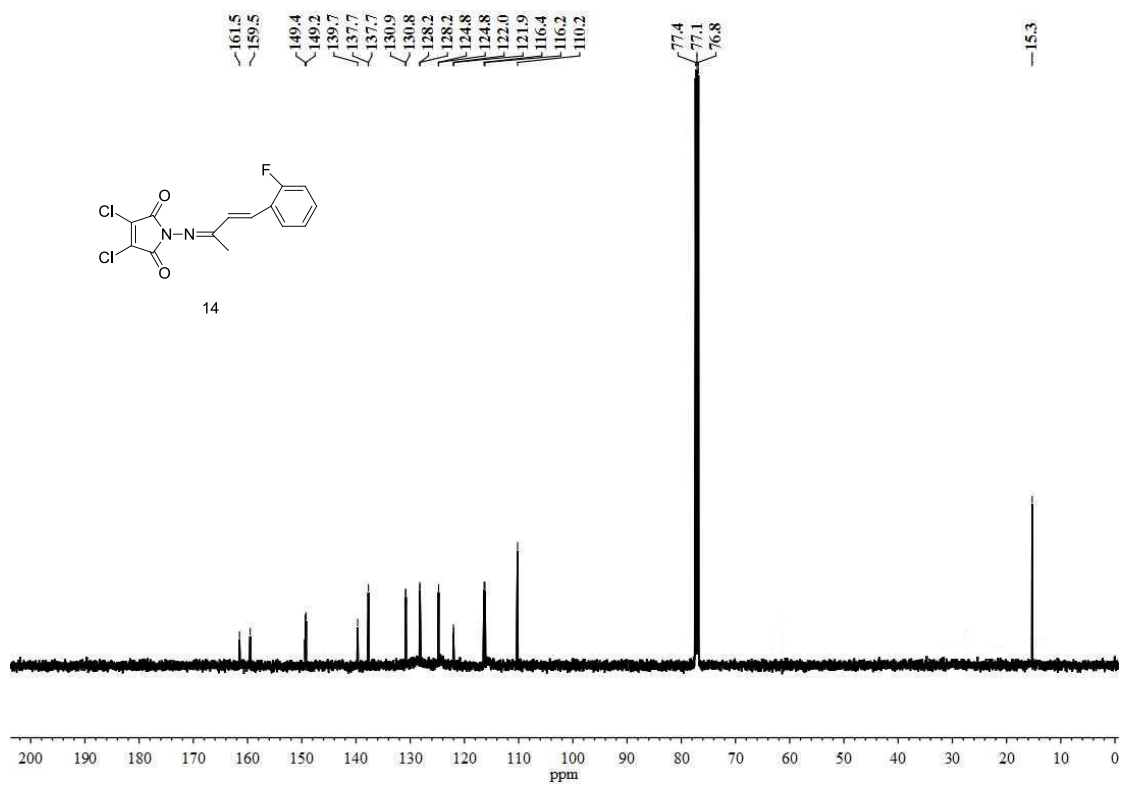

Figure S28 <sup>13</sup>C NMR spectra of compound 14

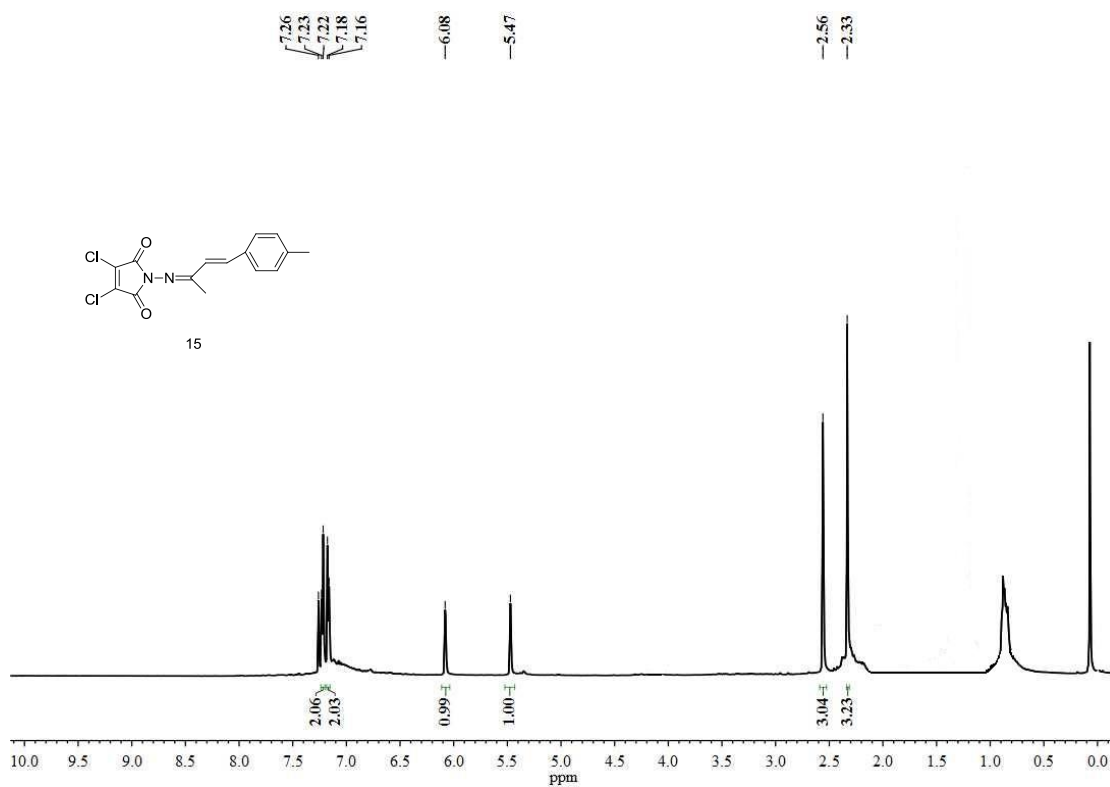

Figure S29 <sup>1</sup>H NMR spectra of compound 15

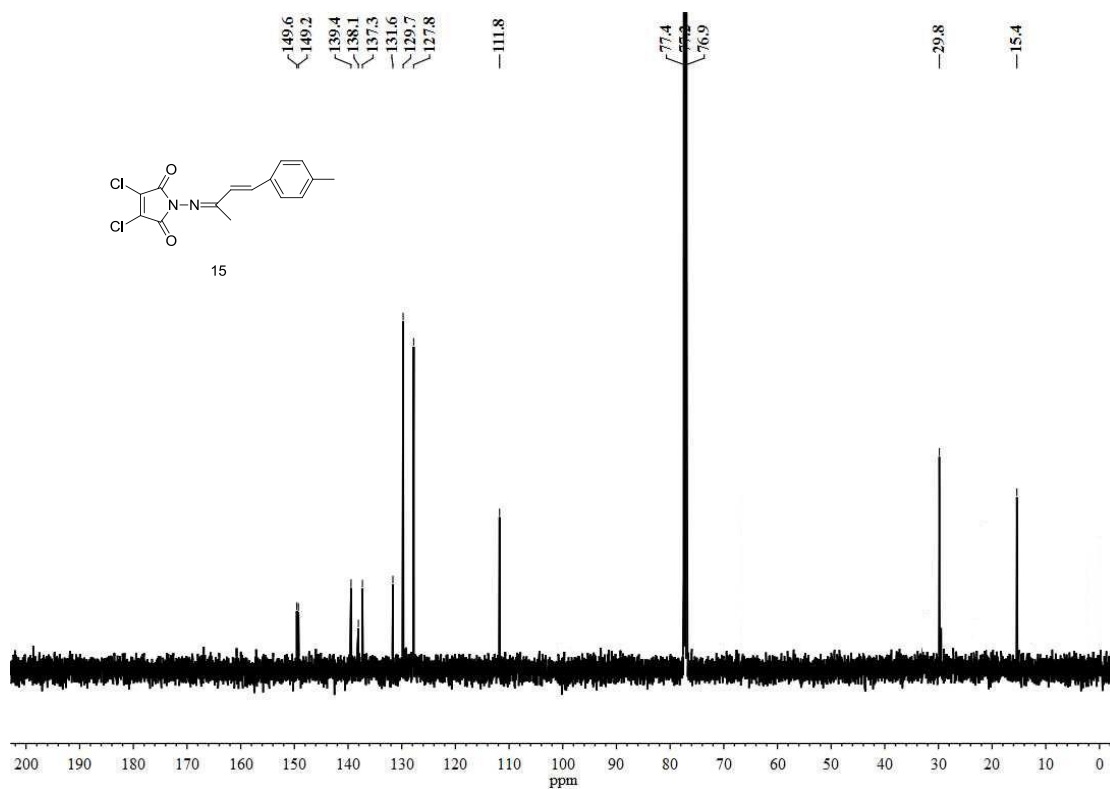

Figure S30 <sup>13</sup>C NMR spectra of compound 15



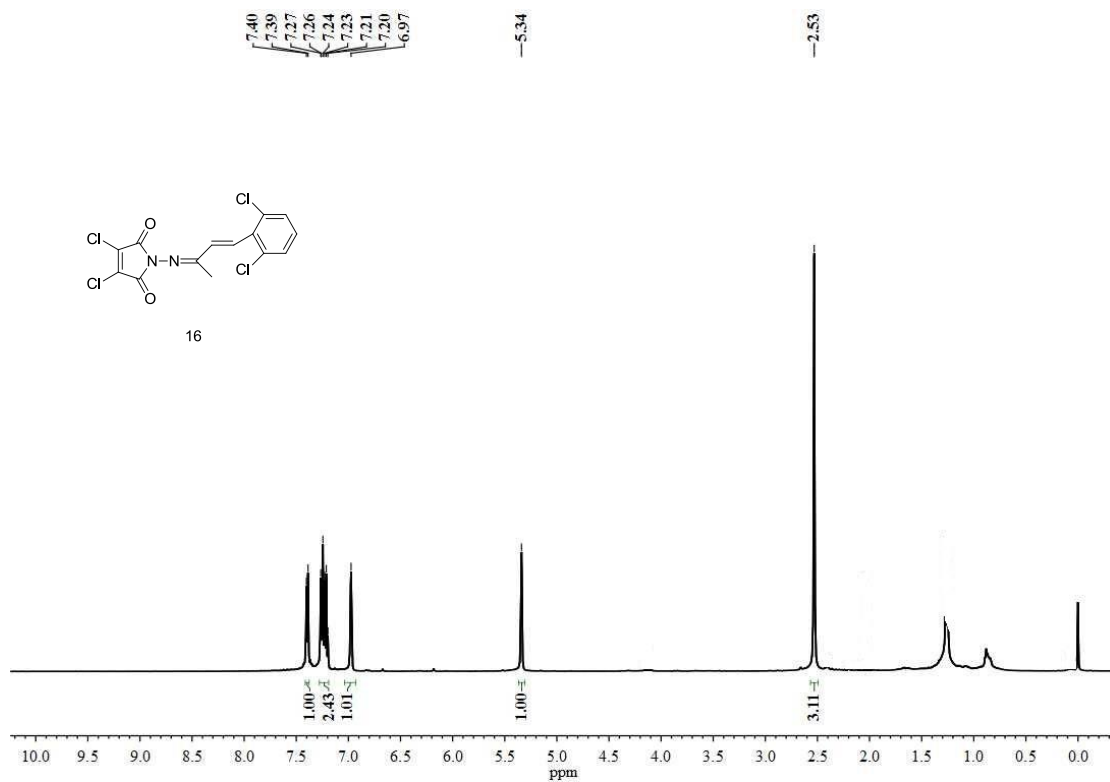

Figure S31 <sup>1</sup>H NMR spectra of compound 16

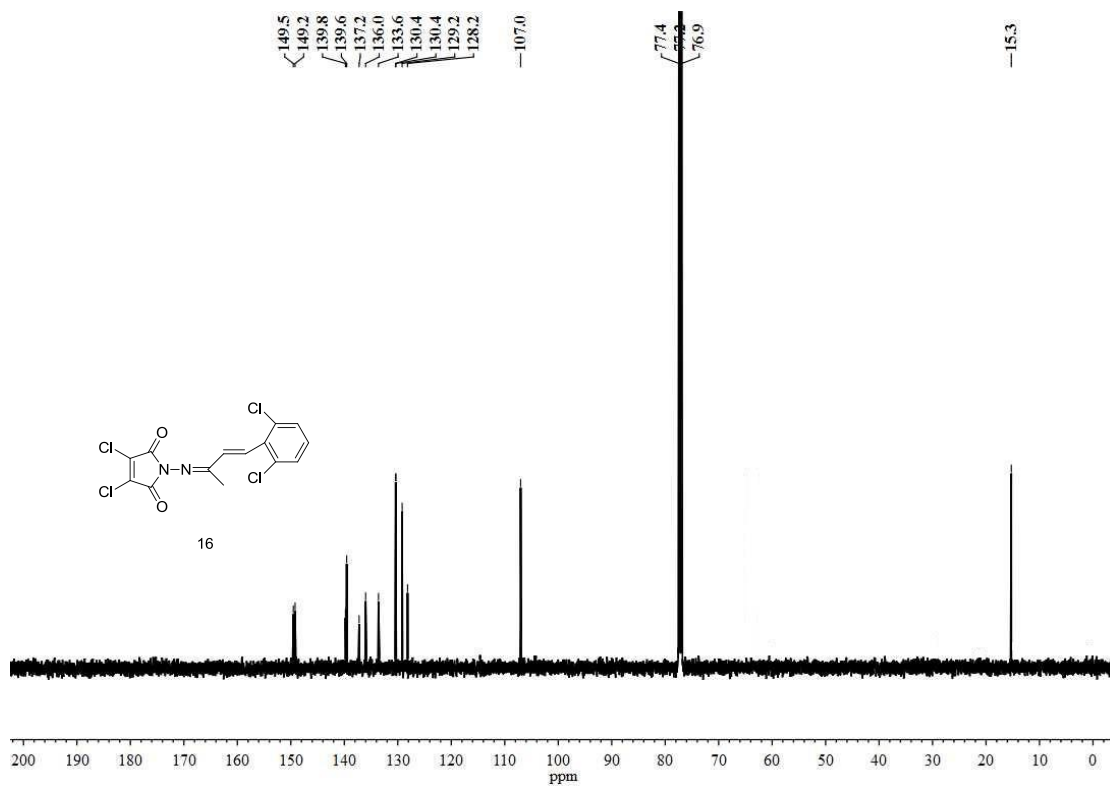

Figure S32 <sup>13</sup>C NMR spectra of compound 16

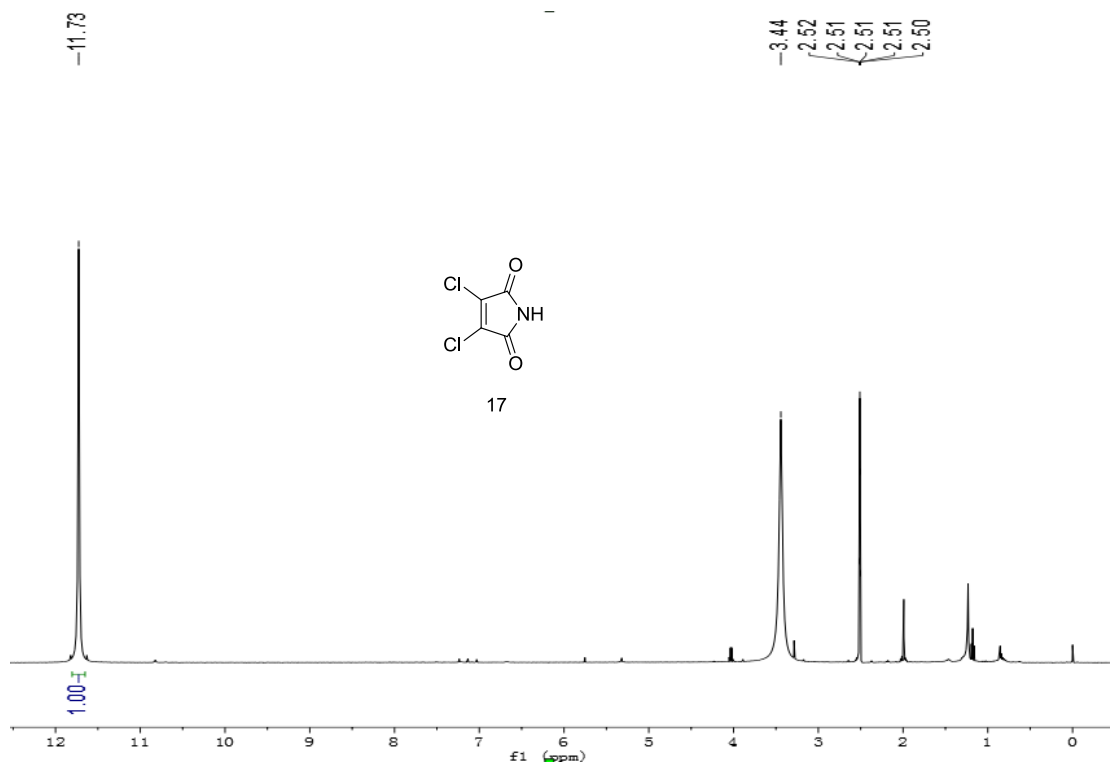

Figure S33  $^1\text{H}$  NMR spectra of compound 17

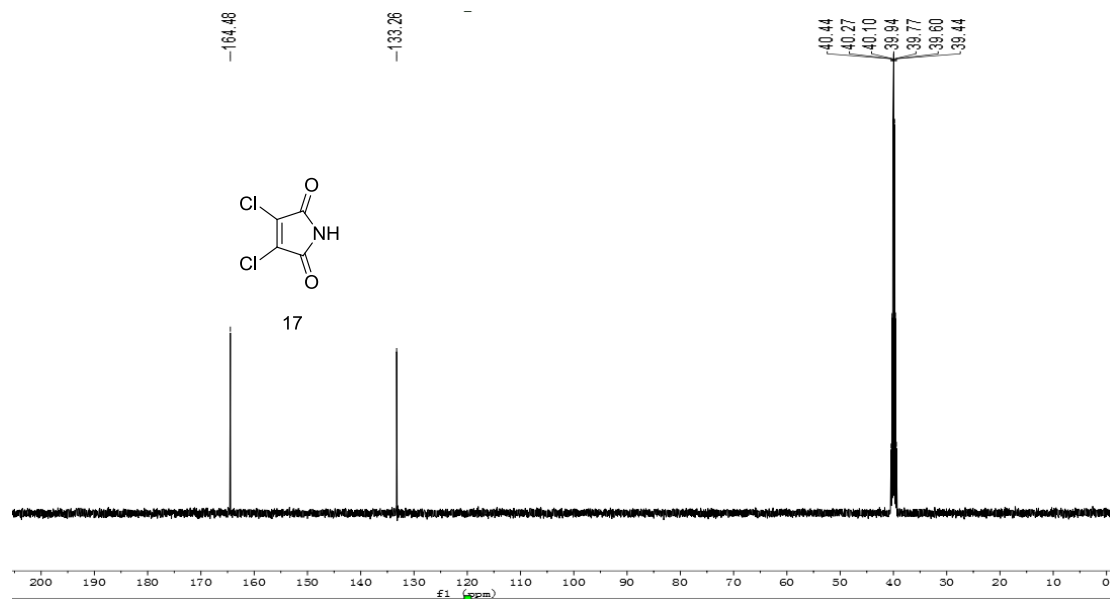

Figure S34  $^{13}\text{C}$  NMR spectra of compound 17
